# Supplementary material for: Solvent-modulated binding selectivity of reaction substrates to onium-based σ-hole donors
Source: Royal Society of Chemistry journal article supplement (doi:10.1039/d3cy00071k), 2023-01-01
Supplement: d3cy00071k2.pdf [file d3cy00071k2.pdf]

## ELECTRONIC SUPPLEMENTARY INFORMATION

### Solvent-modulated Binding Selectivity of Reaction Substrates to Onium-based $\sigma$ -Hole Donors

Alexandra A. Sysoeva, Alexander S. Novikov, Mikhail V. Il'in, Dmitrii S. Bolotin\*

#### Table of contents

|                                                                                                                                                                                                                        |     |
|------------------------------------------------------------------------------------------------------------------------------------------------------------------------------------------------------------------------|-----|
| Synthesis of the sulfonium salt <b>Cat1</b> <sup>OTf</sup> .....                                                                                                                                                       | S2  |
| Synthesis of the sulfonium salt <b>Cat2</b> <sup>OTf</sup> .....                                                                                                                                                       | S3  |
| Synthesis of the sulfonium salt <b>Cat3</b> <sup>OTf</sup> .....                                                                                                                                                       | S4  |
| Spectra of <b>Cat1</b> <sup>OTf</sup> – <b>Cat3</b> <sup>OTf</sup> .....                                                                                                                                               | S5  |
| Representative <sup>1</sup> H NMR monitoring spectra.....                                                                                                                                                              | S14 |
| Plots representing the catalysts' stability in each <sup>1</sup> H NMR monitoring experiments.....                                                                                                                     | S15 |
| Derivation of equations for calculating the reaction rate constants .....                                                                                                                                              | S18 |
| <b>Table S1</b> . Calculated total electronic energies (E, in Hartree), enthalpies (H, in Hartree), Gibbs free energies (G, in Hartree), and entropies (S, cal/mol•K) for optimized equilibrium model structures ..... | S21 |

## Synthesis of the sulfonium salt Cat1<sup>OTf</sup>

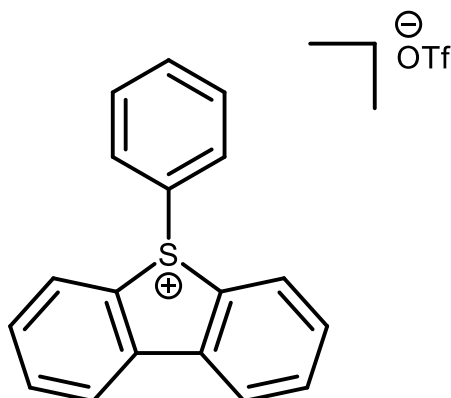

To the mixture of dibenzothiophene (500 mg, 2.75 mmol) and diphenyliodonium triflate (775 mg, 1.81 mmol) in 1,2-dichloroethane (5 mL) was added Cu(OTf)<sub>2</sub> (66 mg, 0.18 mmol) and stirred for 30 min at 130 °C. Then the solvent was evaporated *in vacuo* at 50 °C and product were isolated via column chromatography (eluent: CHCl<sub>3</sub>/MeOH, gradient from 5 to 10 %). After that the solvent was evaporated *in vacuo* at 50 °C, the residue was crystallized under Et<sub>2</sub>O and dried at 50 °C in air.

Yield: 84 % (623 mg). M.p.: 192–193 °C. <sup>1</sup>H NMR (400.13 MHz, (CD<sub>3</sub>)<sub>2</sub>CO): δ = 8.56 (d, <sup>3</sup>J<sub>HH</sub> = 7.9 Hz, 2H, Ar), 8.42 (d, <sup>3</sup>J<sub>HH</sub> = 8.1 Hz, 2H, Ar), 8.03 (td, <sup>3</sup>J<sub>HH</sub> = 7.9 Hz, <sup>4</sup>J<sub>HH</sub> = 0.9 Hz, 2H, Ar), 7.84 – 7.79 (m, 5H, Ar), 7.70 – 7.66 (m, 2H, Ar). <sup>13</sup>C{<sup>1</sup>H} NMR (101.61 MHz, (CD<sub>3</sub>)<sub>2</sub>CO): δ = 139.6, 134.9, 134.5, 132.5, 131.7, 131.6, 130.5, 128.4, 127.8, 124.7 (Ar), 121.6 (q, <sup>1</sup>J<sub>CF</sub> = 321.9 Hz, CF<sub>3</sub>). HRMS (ESI-TOF): m/z calcd for C<sub>18</sub>H<sub>13</sub>S<sup>+</sup>: 261.0733; found: 261.0734.

## Synthesis of the sulfonium salt Cat2<sup>OTf</sup>

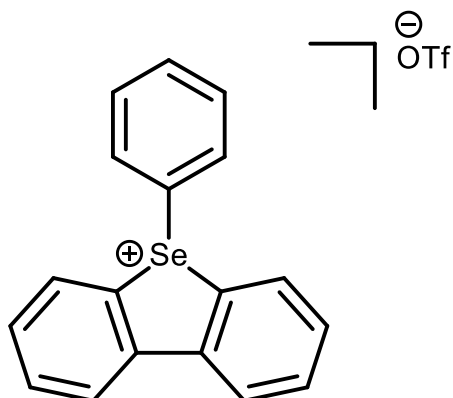

Cu(OTf)<sub>2</sub> (33 mg, 0.09 mmol) was added to the mixture of dibenzoselenophene (253 mg, 1.10 mmol) and diphenyliodonium triflate (393 mg, 0.91 mmol) in 1,2-dichloroethane (5 mL) and the resulting mixture was stirred for 30 min at 130 °C. Then the solvent was evaporated *in vacuo* at 50 °C and product was isolated via column chromatography (eluent: CHCl<sub>3</sub>/MeOH, 95:5). After that the solvent was evaporated in *vacuo* at 50 °C, the residue was crystallized using Et<sub>2</sub>O and dried at 50 °C in air.

Yield: 80 % (335 mg). M.p.: 200–202 °C. <sup>1</sup>H NMR (400.13 MHz, (CD<sub>3</sub>)<sub>2</sub>CO): δ = 8.47–8.44 (m, 4H, Ar), 7.93 (t, <sup>3</sup>J<sub>HH</sub> = 7.6 Hz, 2H, Ar), 7.74 (t, <sup>3</sup>J<sub>HH</sub> = 7.7 Hz, 2H, Ar), 7.69–7.67 (m, 2H, Ar), 7.64–7.60 (m, 1H, Ar), 7.56–7.52 (m, 2H, Ar). <sup>13</sup>C{<sup>1</sup>H} NMR (101.61 MHz, (CD<sub>3</sub>)<sub>2</sub>CO): δ = 141.7, 135.7, 133.5, 132.9, 131.6, 131.3, 131.1, 130.0, 129.7, 125.2 (Ar), 121.4 (q, <sup>1</sup>J<sub>CF</sub> = 321.9 Hz, CF<sub>3</sub>). HRMS (ESI-TOF): m/z calcd for C<sub>18</sub>H<sub>13</sub>Se<sup>+</sup>: 309.0177; found: 309.0183.

## Synthesis of dibenziodolium triflate Cat3<sup>OTf</sup>

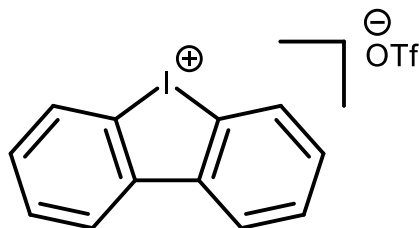

This salt was synthesized according to published procedure (DOI: 10.1021/acs.joc.1c02885). *m*-CPBA (77%, 665 mg, 2.96 mmol) and TfOH (0.521 mL, 5.89 mmol) were added to a stirred solution of 2-iodo-1,1'-biphenyl (550 mg, 0.346 mL, 1.97 mmol) in dry CH<sub>2</sub>Cl<sub>2</sub> (5 mL) and then stirred for 1 h at RT. After that the solvent was evaporated *in vacuo* at RT, and the product was crystallized under Et<sub>2</sub>O (10 mL). The precipitate formed was stirred for 20 min at RT and filtered off, washed with Et<sub>2</sub>O (10 mL), and dried at 50 °C in air.

Yield: 90 % (760 mg). M.p.: 240–242 °C. <sup>1</sup>H NMR (400.13 MHz, DMSO-d<sub>6</sub>): δ = 8.37 (dd, <sup>3</sup>J<sub>HH</sub> = 8.0 Hz, <sup>4</sup>J<sub>HH</sub> = 1.5 Hz, 1H, Ar), 8.15 (d, <sup>3</sup>J<sub>HH</sub> = 8.1 Hz, 1H, Ar), 7.79 (t, <sup>3</sup>J<sub>HH</sub> = 7.5 Hz, 1H, Ar), 7.67 (td, <sup>3</sup>J<sub>HH</sub> = 7.8 Hz, <sup>4</sup>J<sub>HH</sub> = 1.4 Hz, 1H, Ar). <sup>13</sup>C{<sup>1</sup>H} NMR (101.61 MHz, DMSO-d<sub>6</sub>): δ = 142.1, 131.5, 131.1, 131.0, 127.4 and 121.9 (Ar); 121.2 (q, <sup>1</sup>J<sub>CF</sub> = 322.3 Hz, CF<sub>3</sub>). HRMS (ESI) *m/z*: [M]<sup>+</sup> Calcd for C<sub>12</sub>H<sub>8</sub>I 278.9665; Found 278.9667.

Spectra of Cat1<sup>OTf</sup>-Cat3<sup>OTf</sup>

Cat1<sup>OTf</sup>, 400.13 MHz, (CD<sub>3</sub>)<sub>2</sub>CO, 298 K

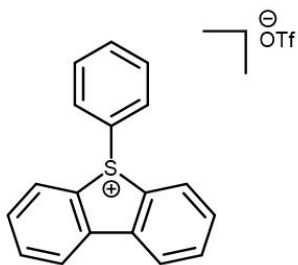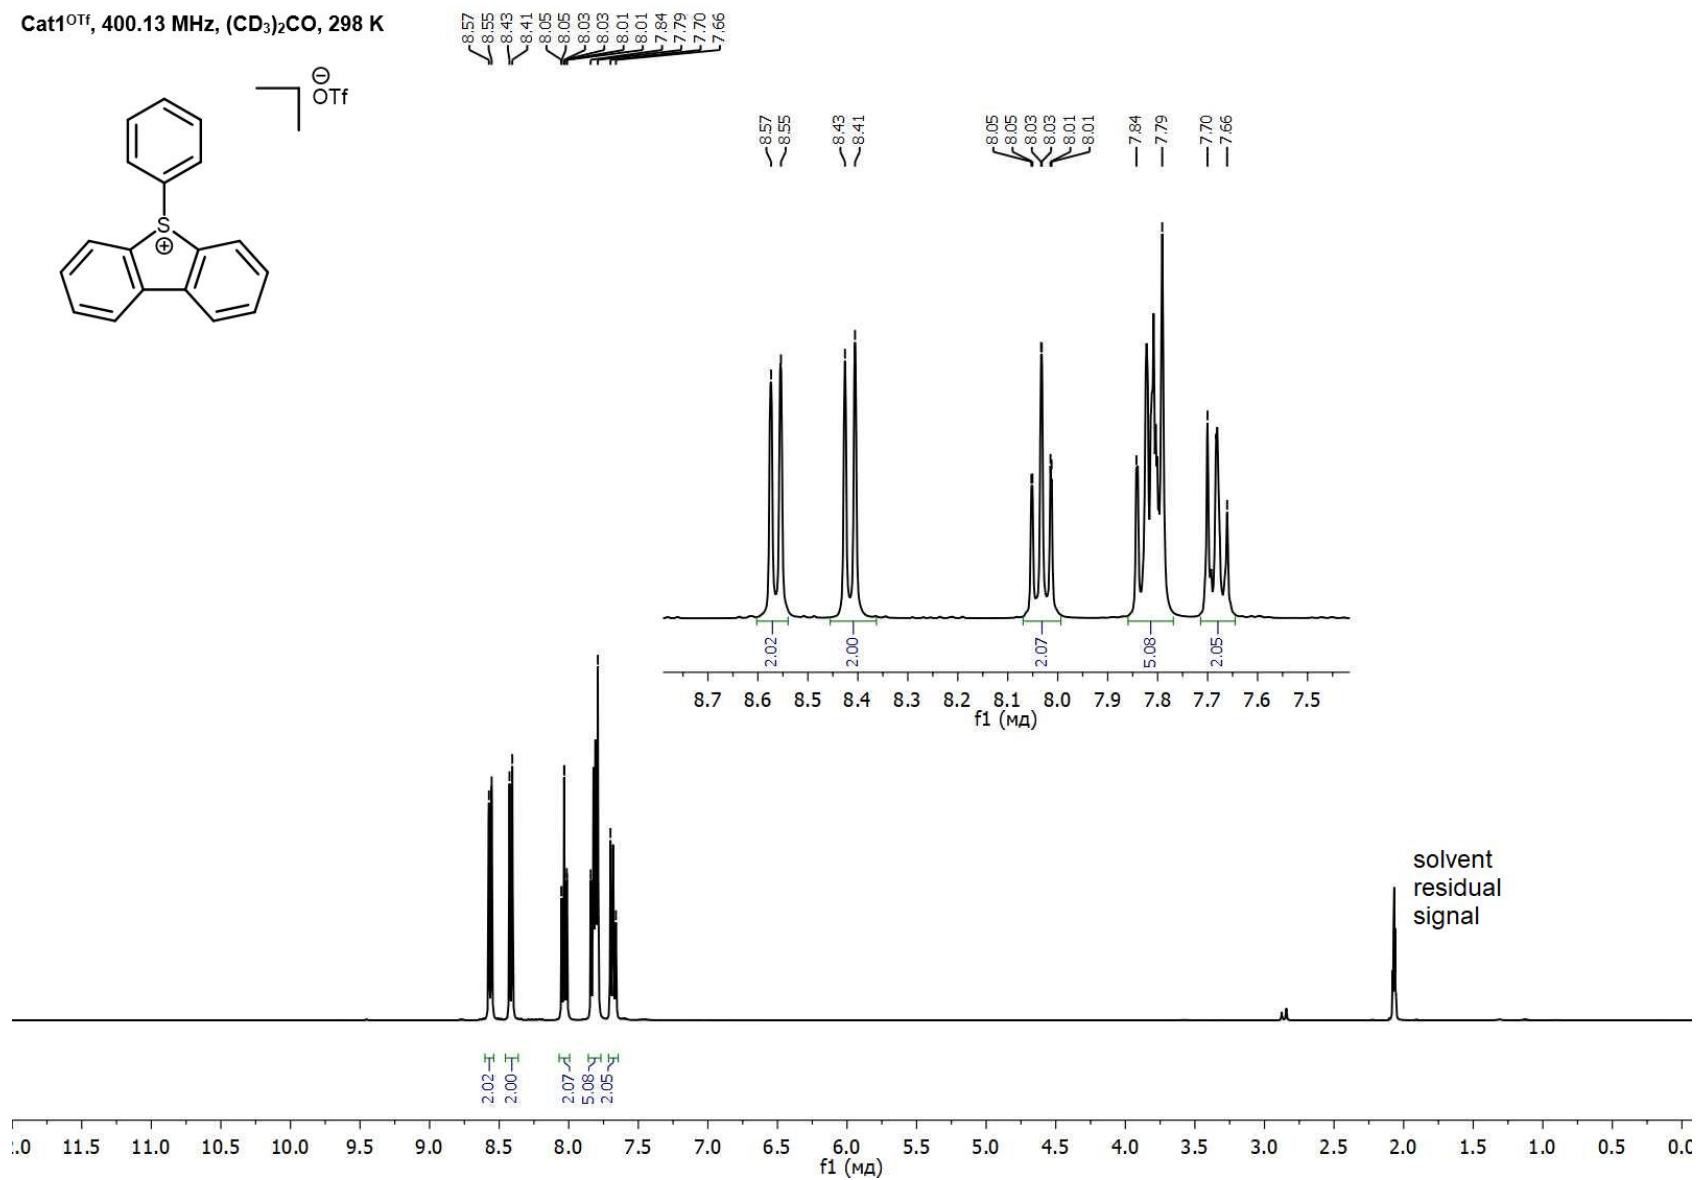

Figure S1. <sup>1</sup>H NMR spectrum of Cat1<sup>OTf</sup>.

Cat1<sup>OTf</sup>, 101.61 MHz, (CD<sub>3</sub>)<sub>2</sub>CO, 298 K

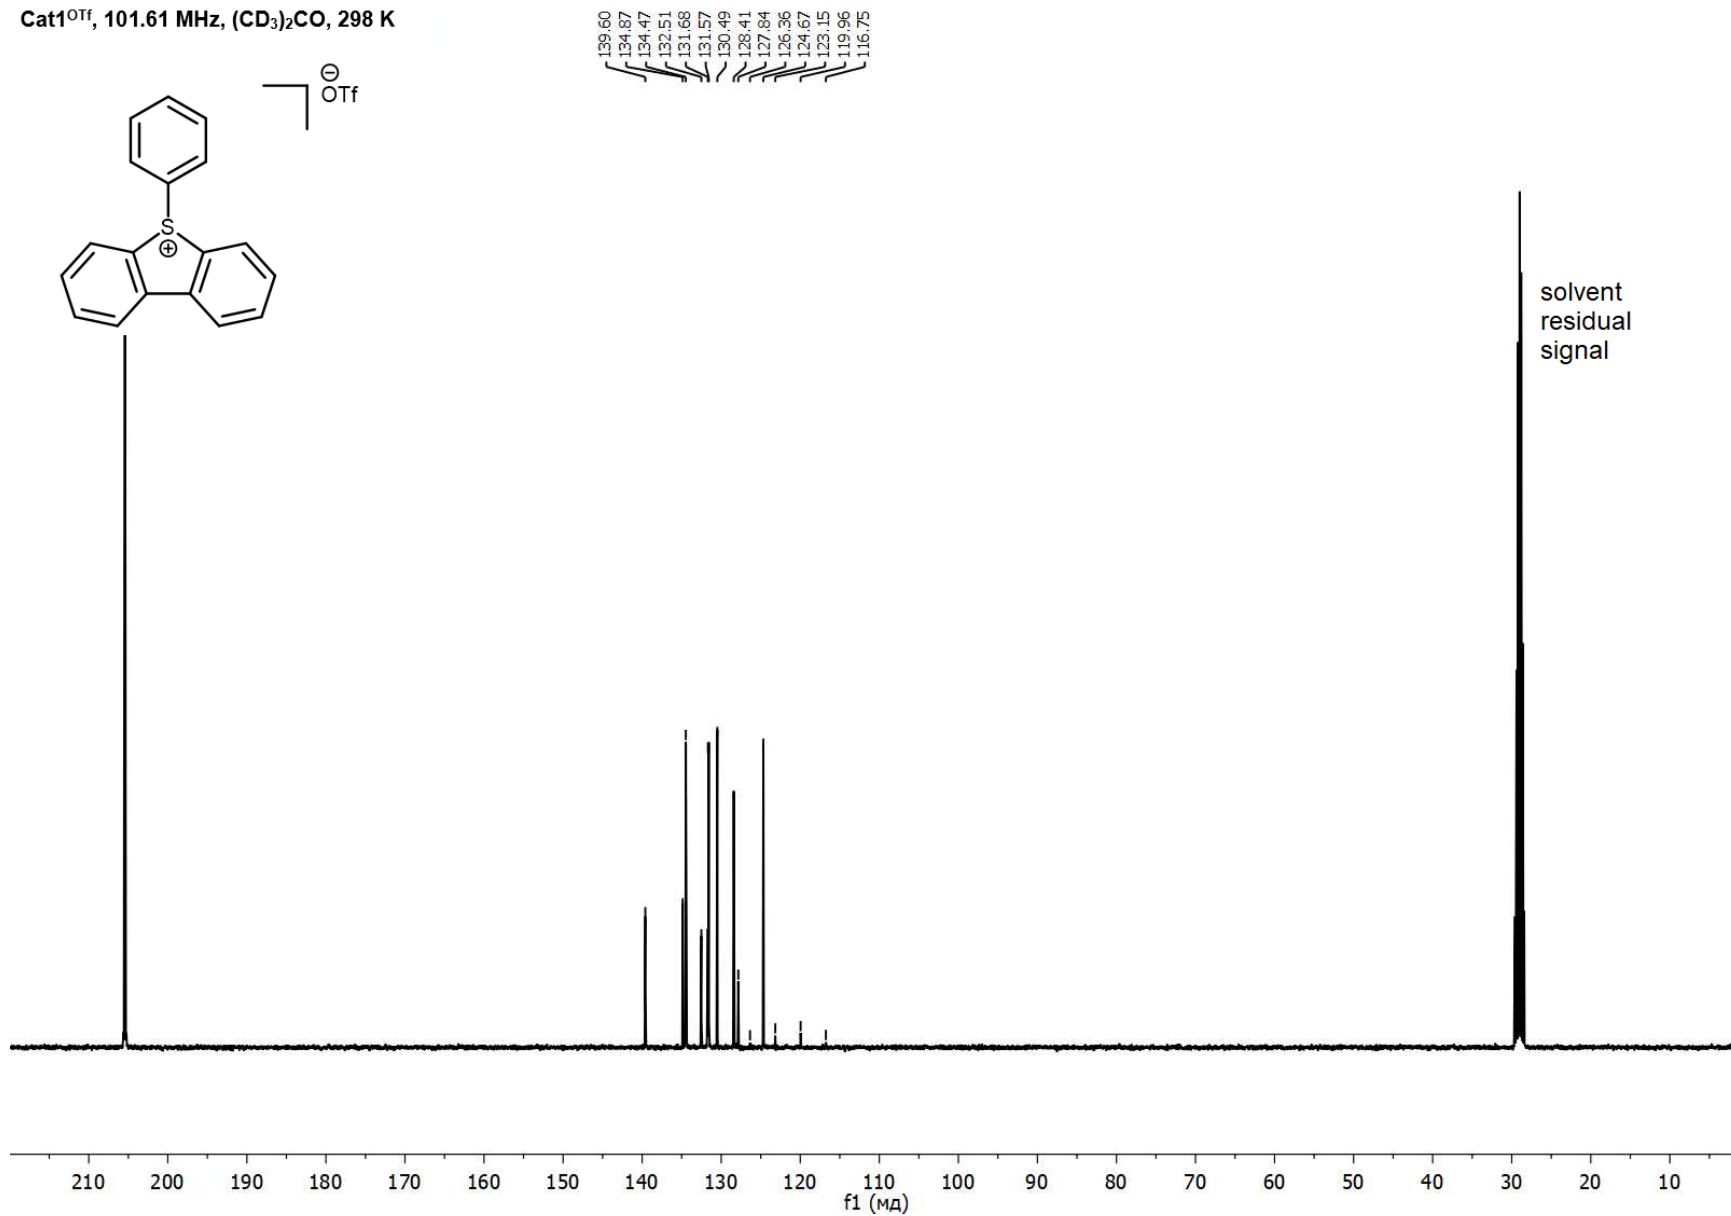

Figure S2. <sup>13</sup>C{<sup>1</sup>H} NMR spectrum of Cat1<sup>OTf</sup>.

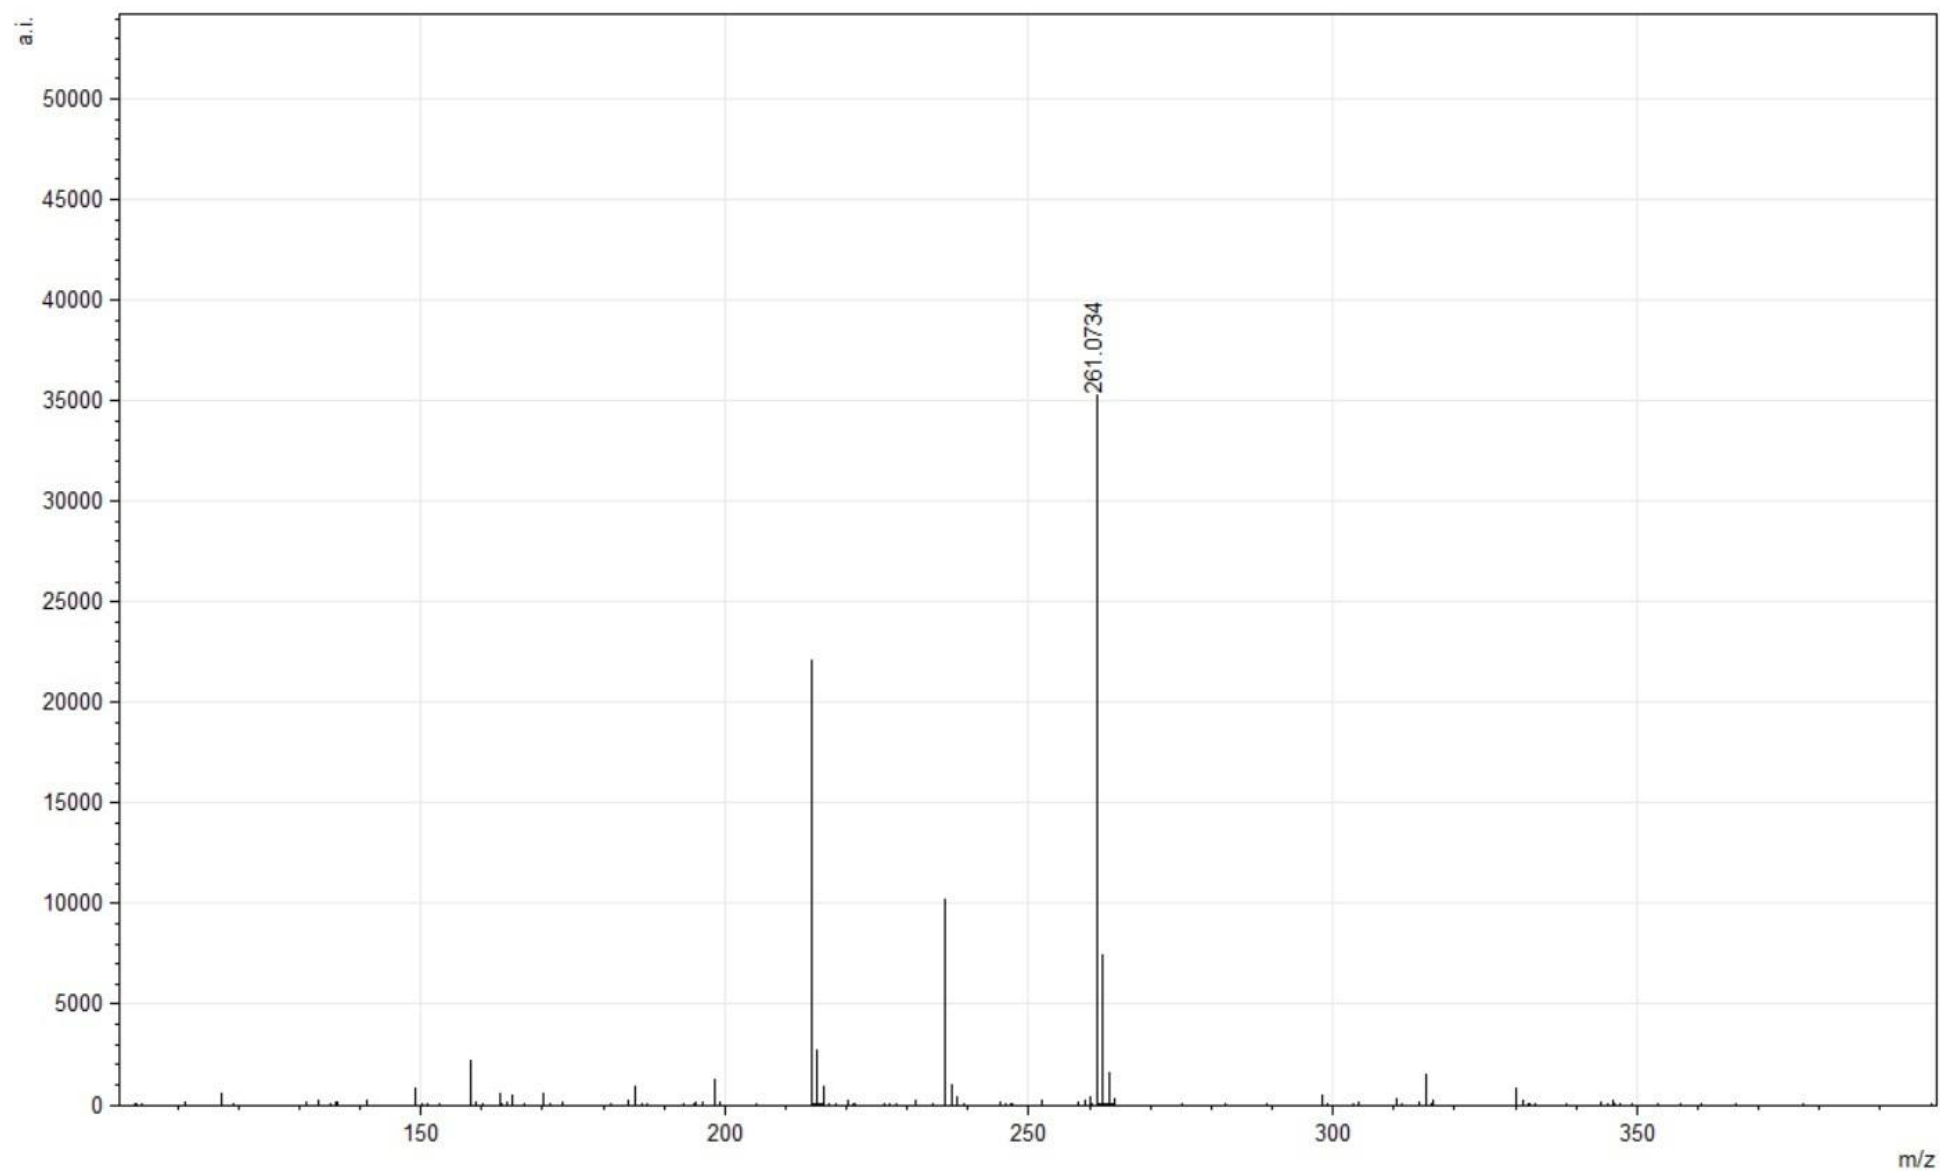

**Figure S3.** HRESI<sup>+</sup>-MS of **Cat1<sup>OTf</sup>**.

Cat2<sup>OTf</sup>, 400.13 MHz, (CD<sub>3</sub>)<sub>2</sub>CO, 298 K

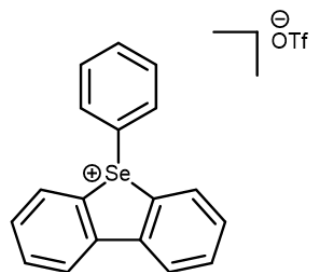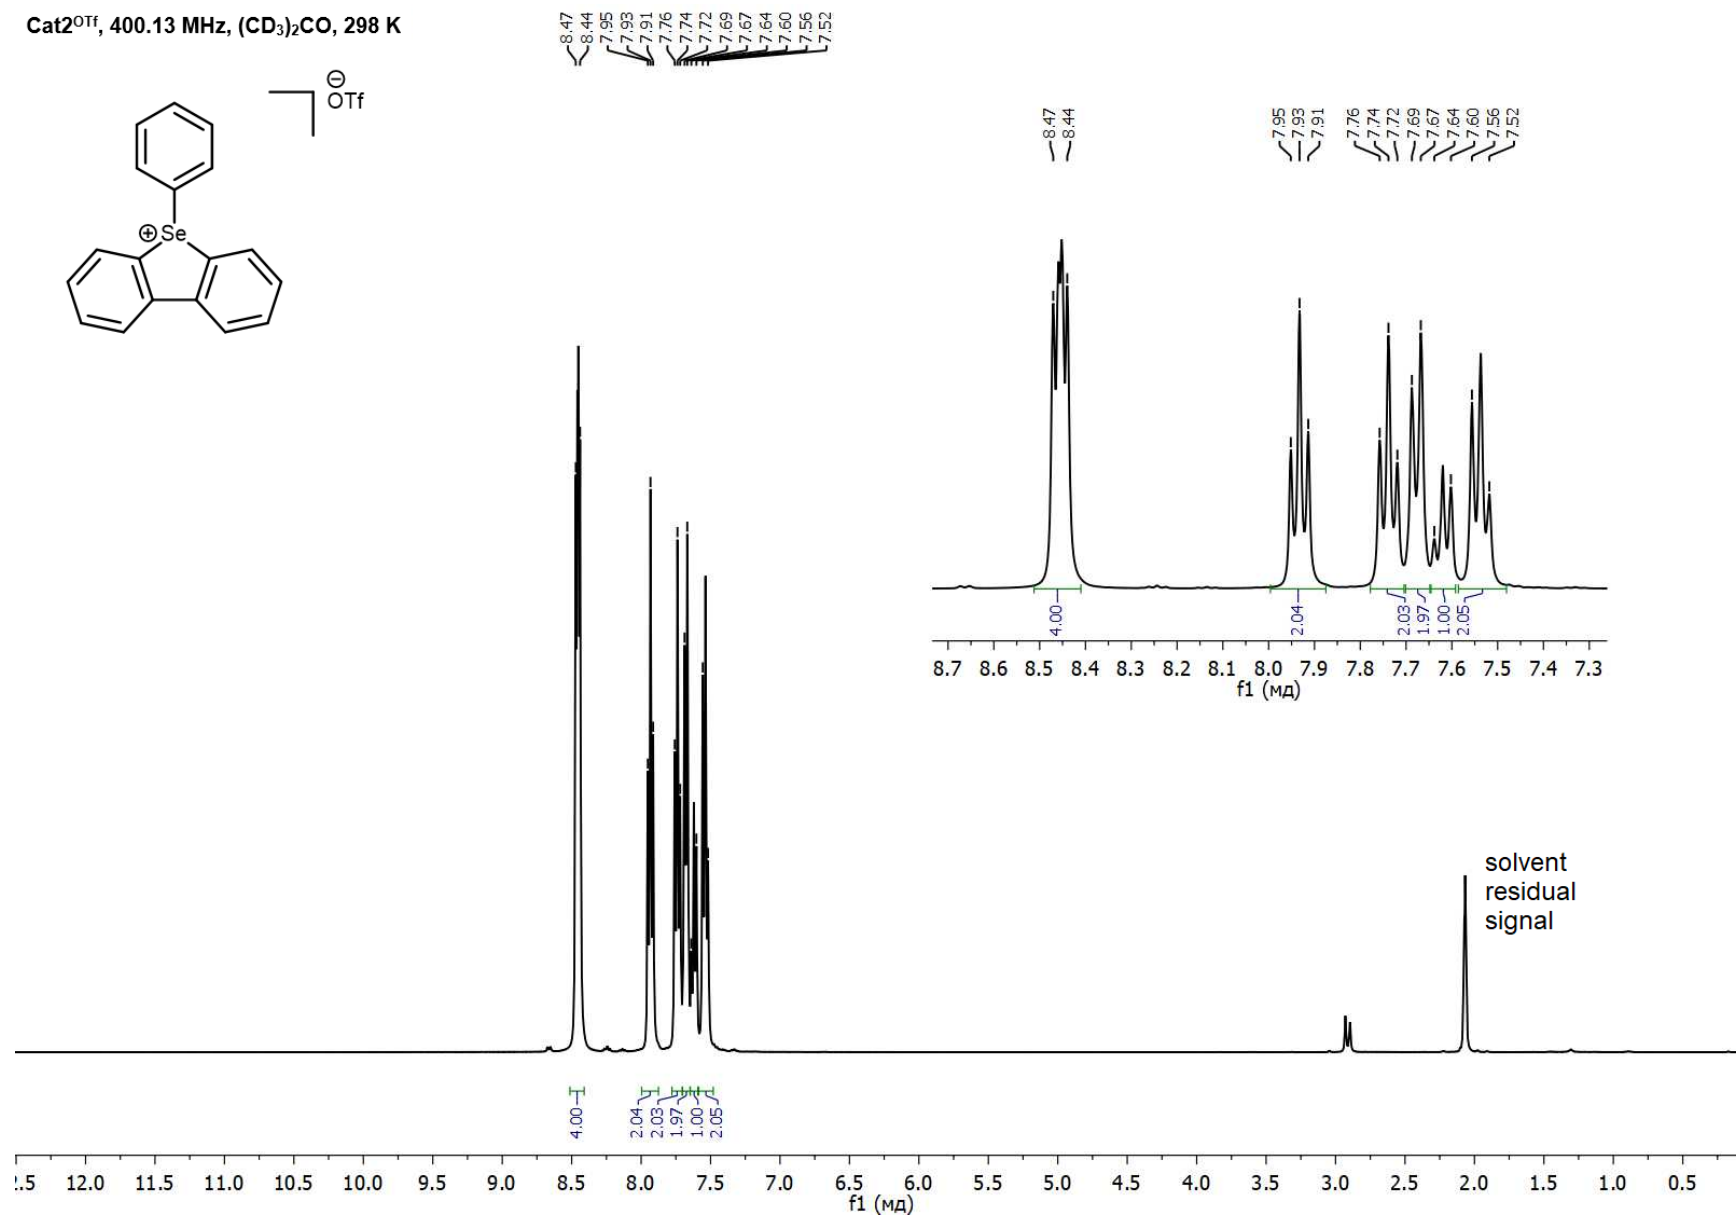

Figure S4. <sup>1</sup>H NMR spectrum of Cat2<sup>OTf</sup>.



Cat2<sup>OTf</sup>, 101.61 MHz, (CD<sub>3</sub>)<sub>2</sub>CO, 298 K

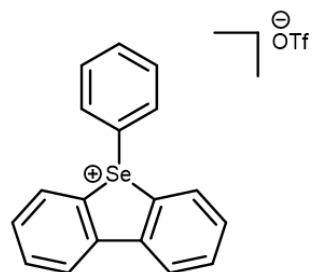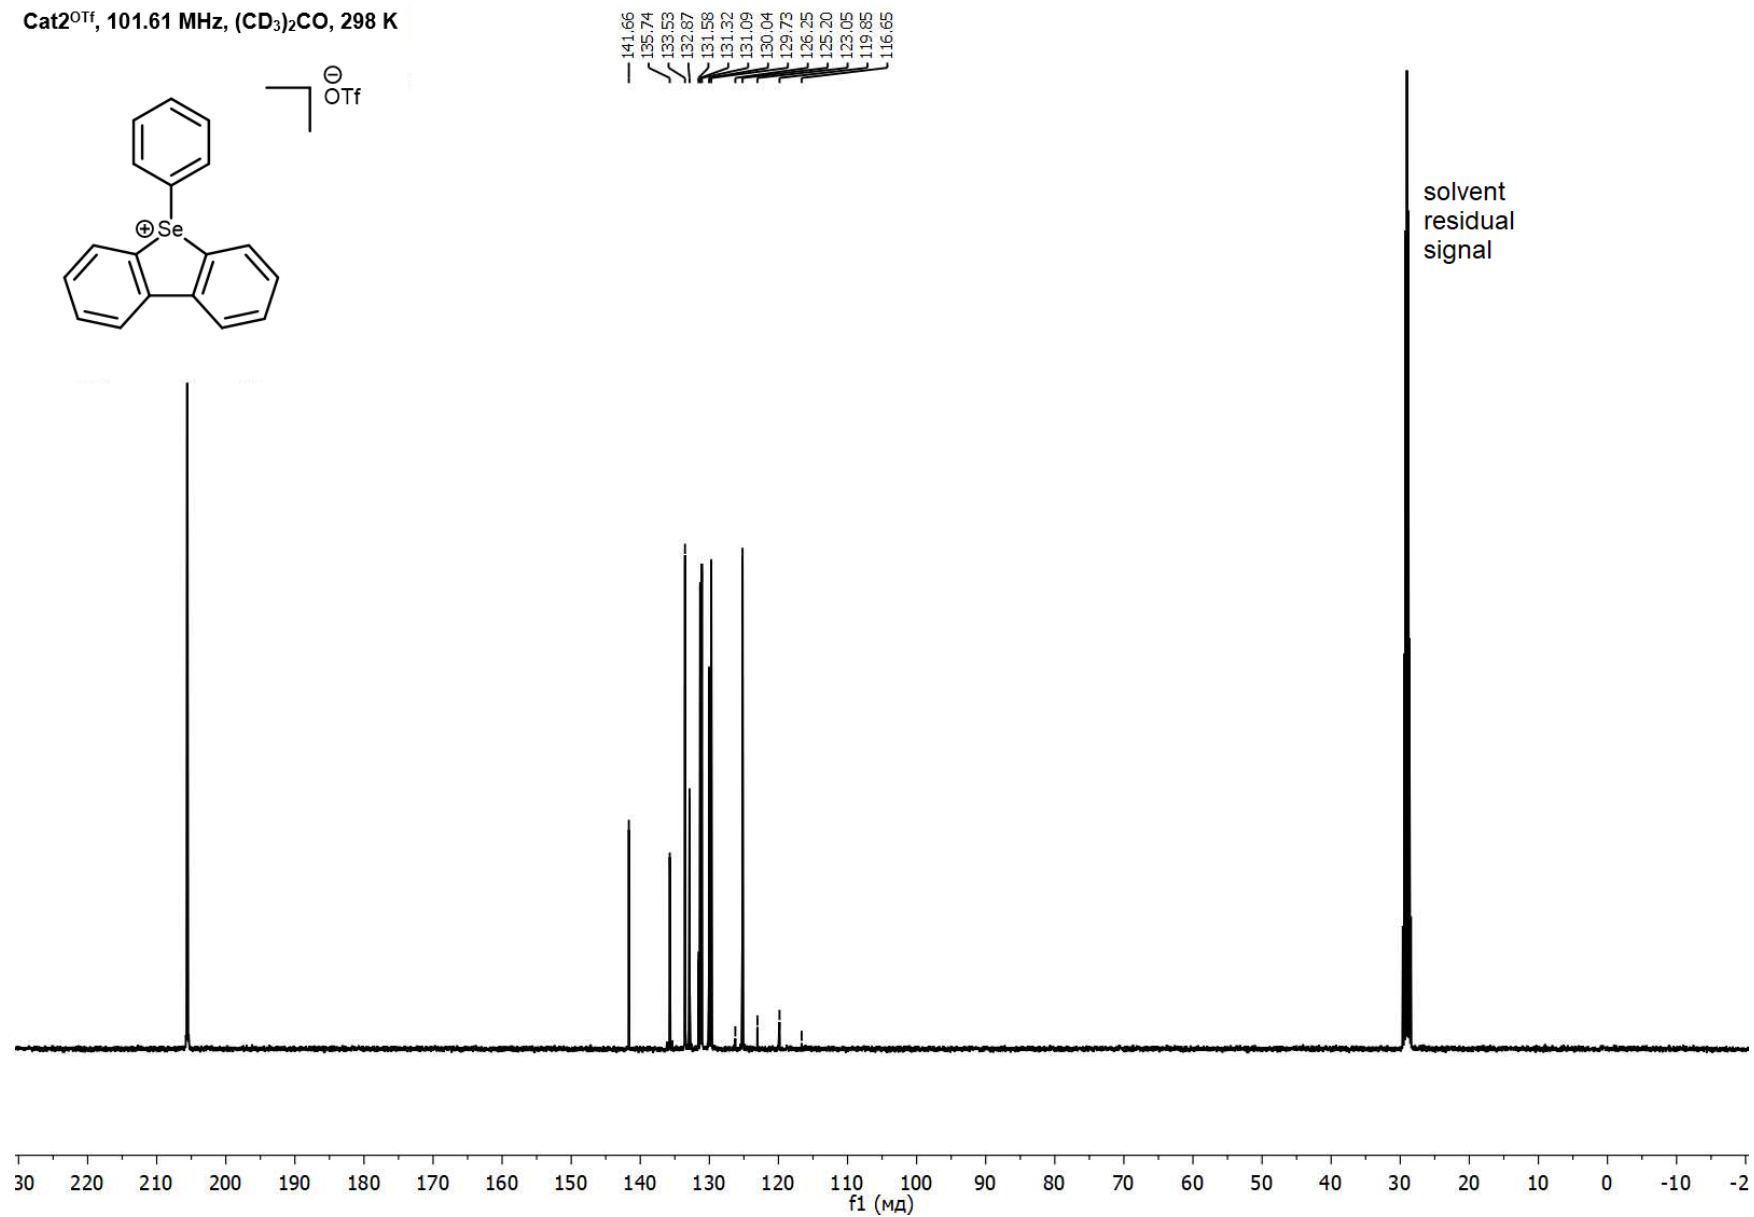

Figure S5. <sup>13</sup>C{<sup>1</sup>H} NMR spectrum of Cat2<sup>OTf</sup>.

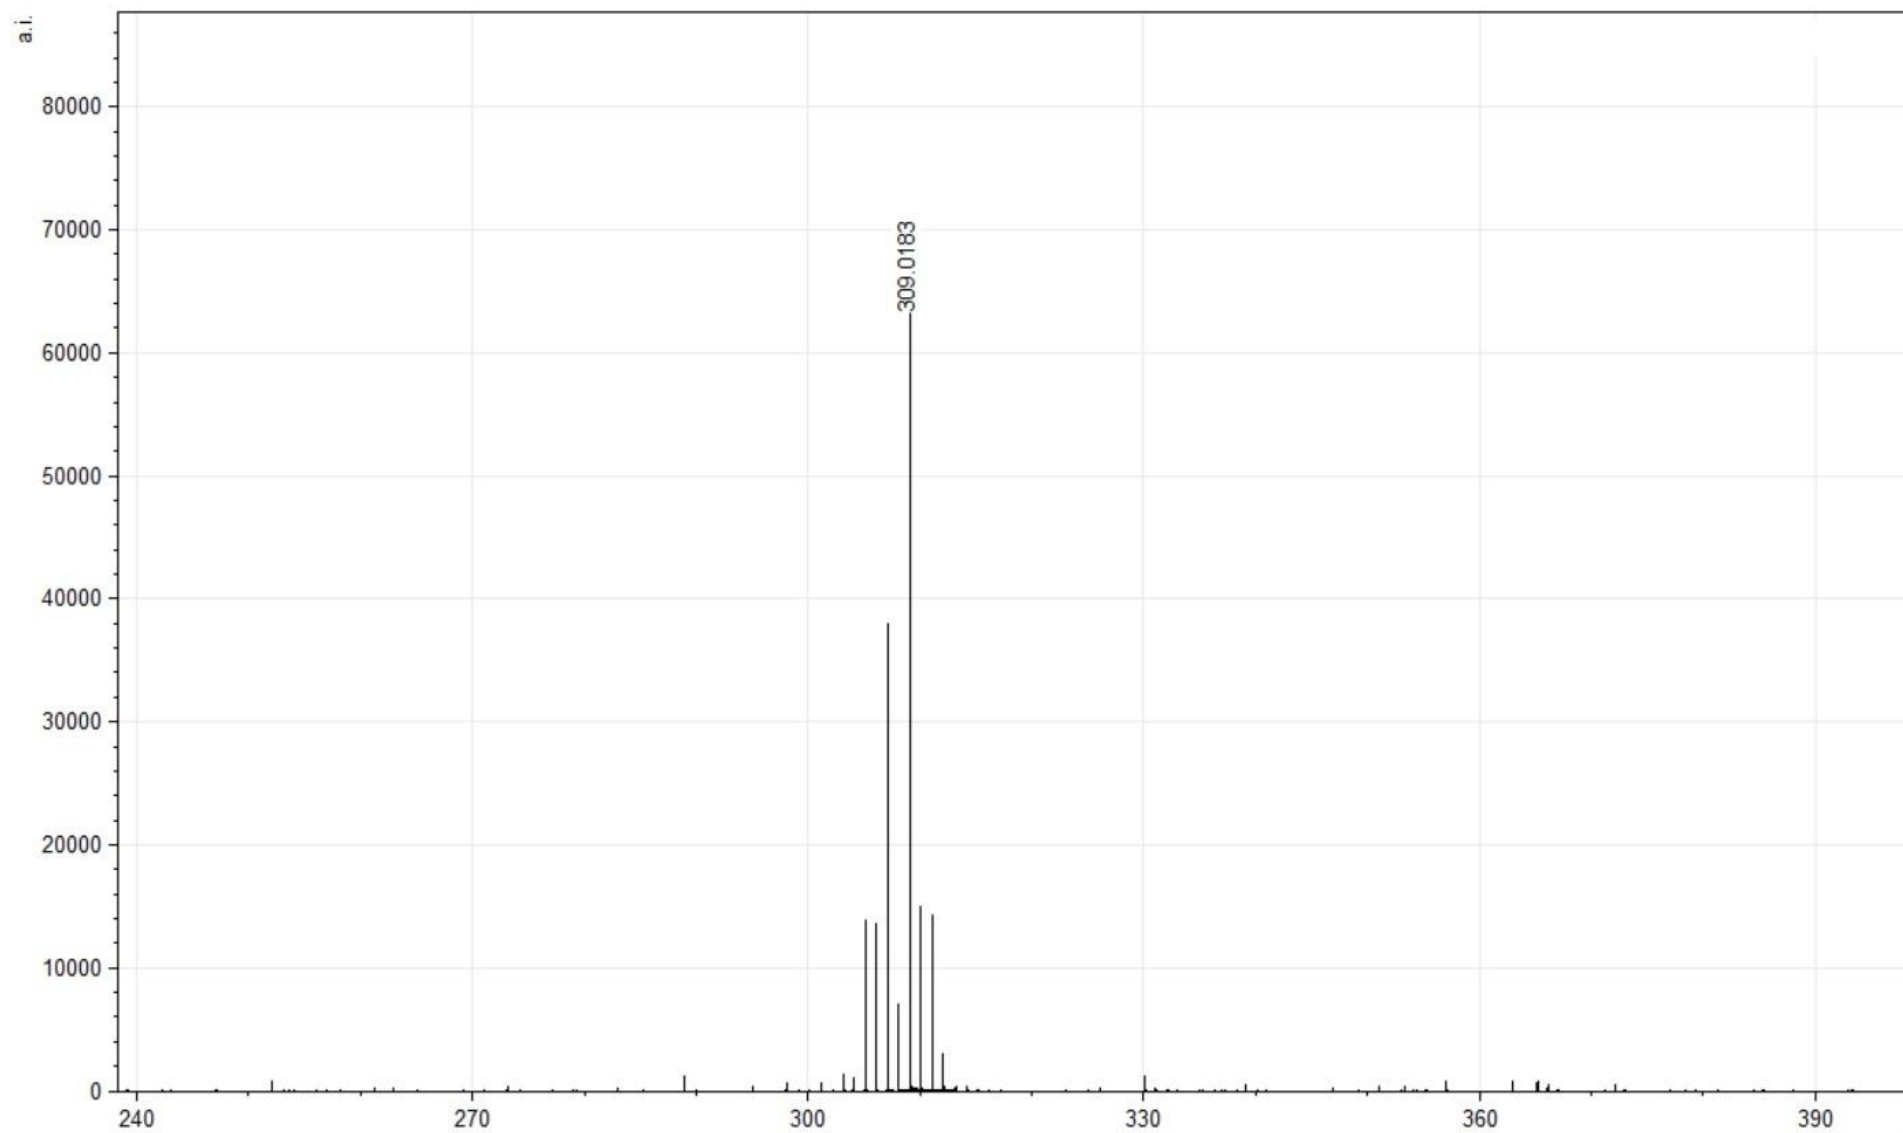

**Figure S6.** HRESI<sup>+</sup>-MS of **Cat2<sup>OTf</sup>**.

Cat3<sup>OTf</sup>, 400.13 MHz, (CD<sub>3</sub>)<sub>2</sub>SO, 298 K

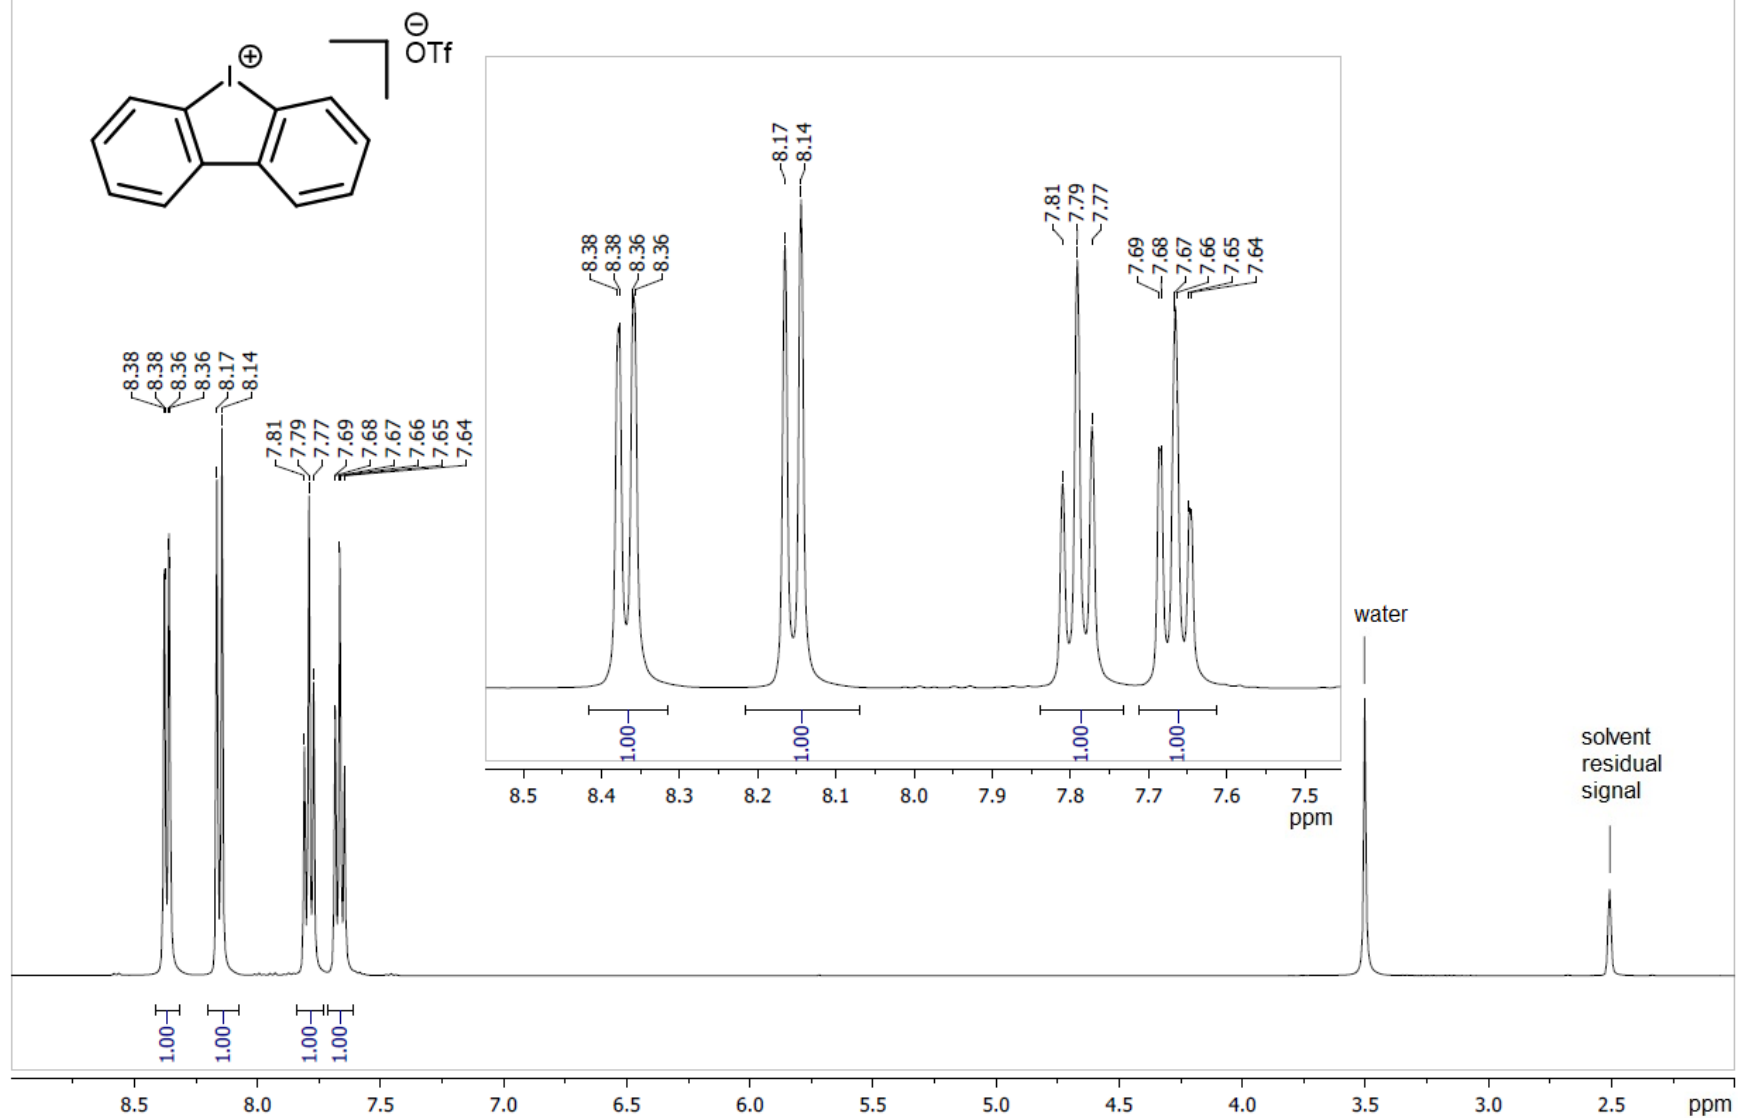

Figure S7. <sup>1</sup>H NMR spectrum of Cat3<sup>OTf</sup>.

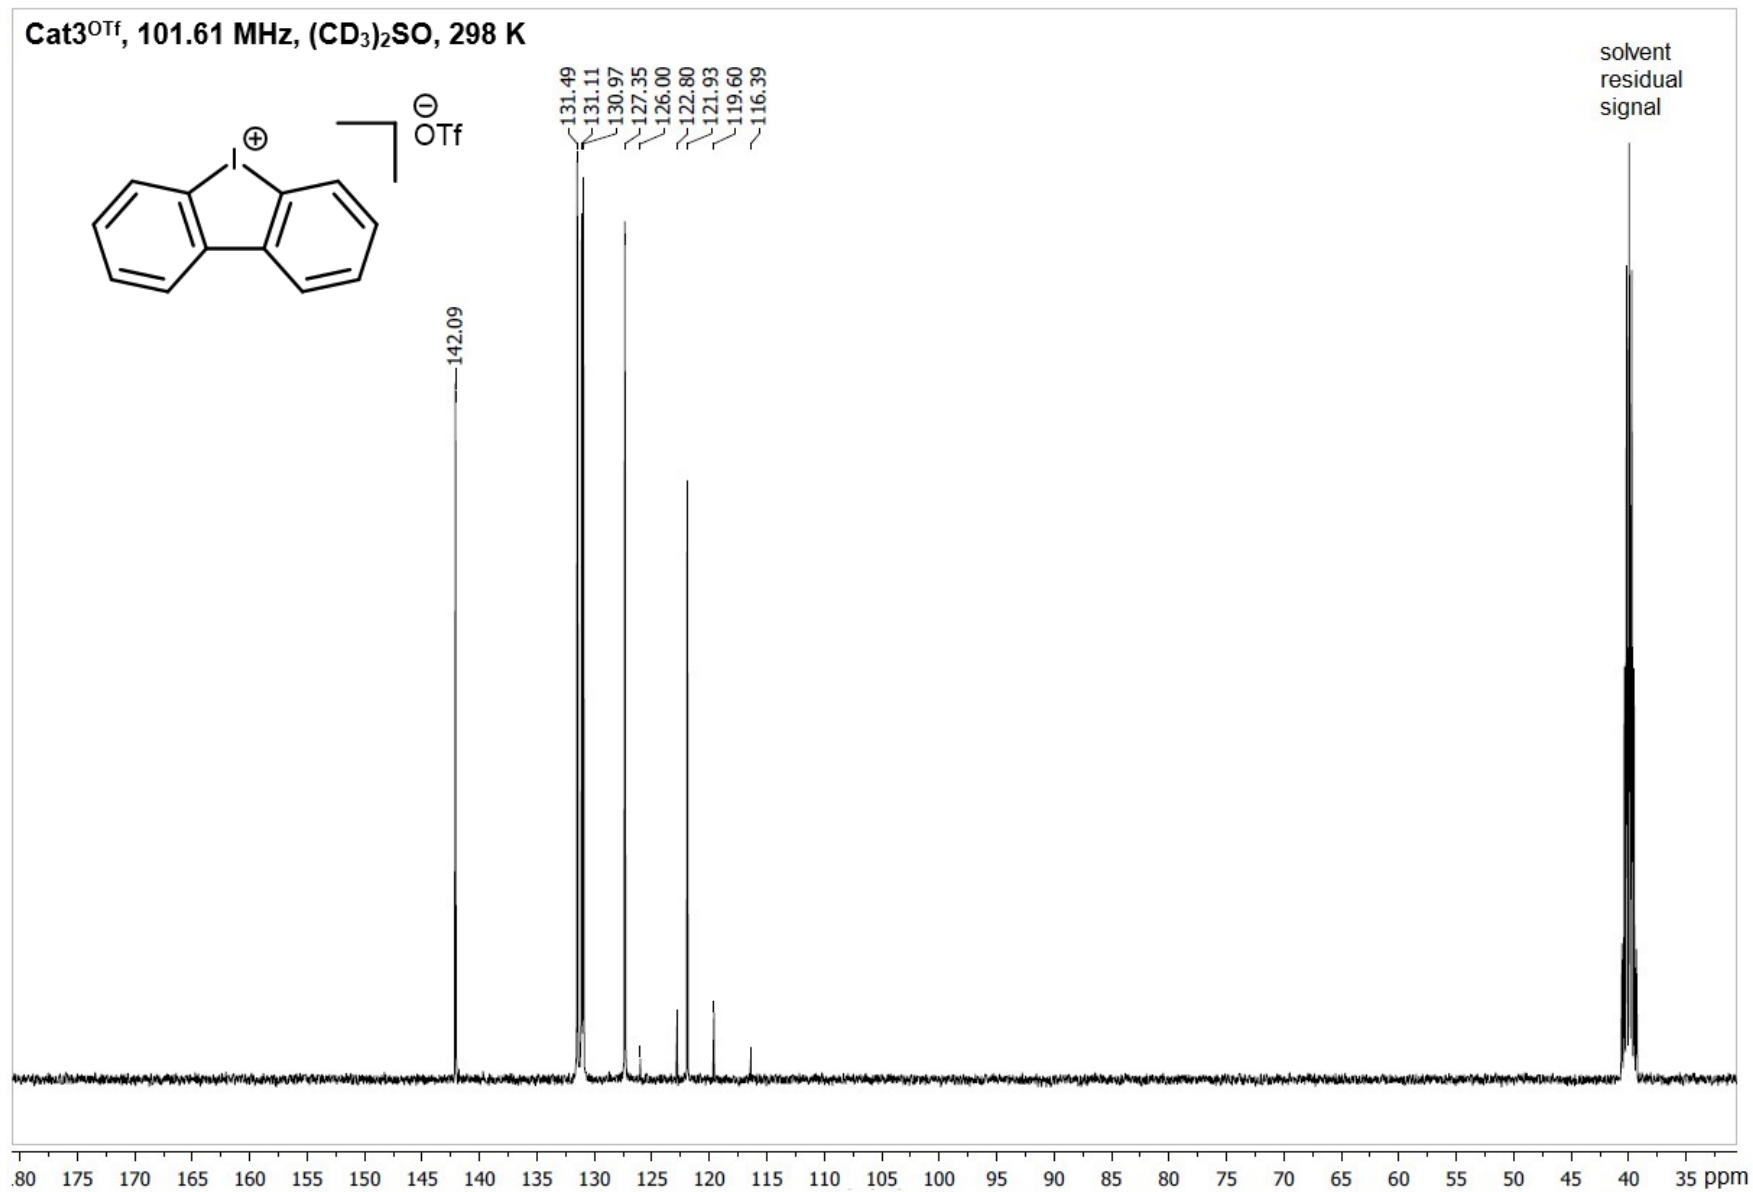

**Figure S8.** <sup>13</sup>C{<sup>1</sup>H} NMR spectrum of **Cat3<sup>OTf</sup>**.

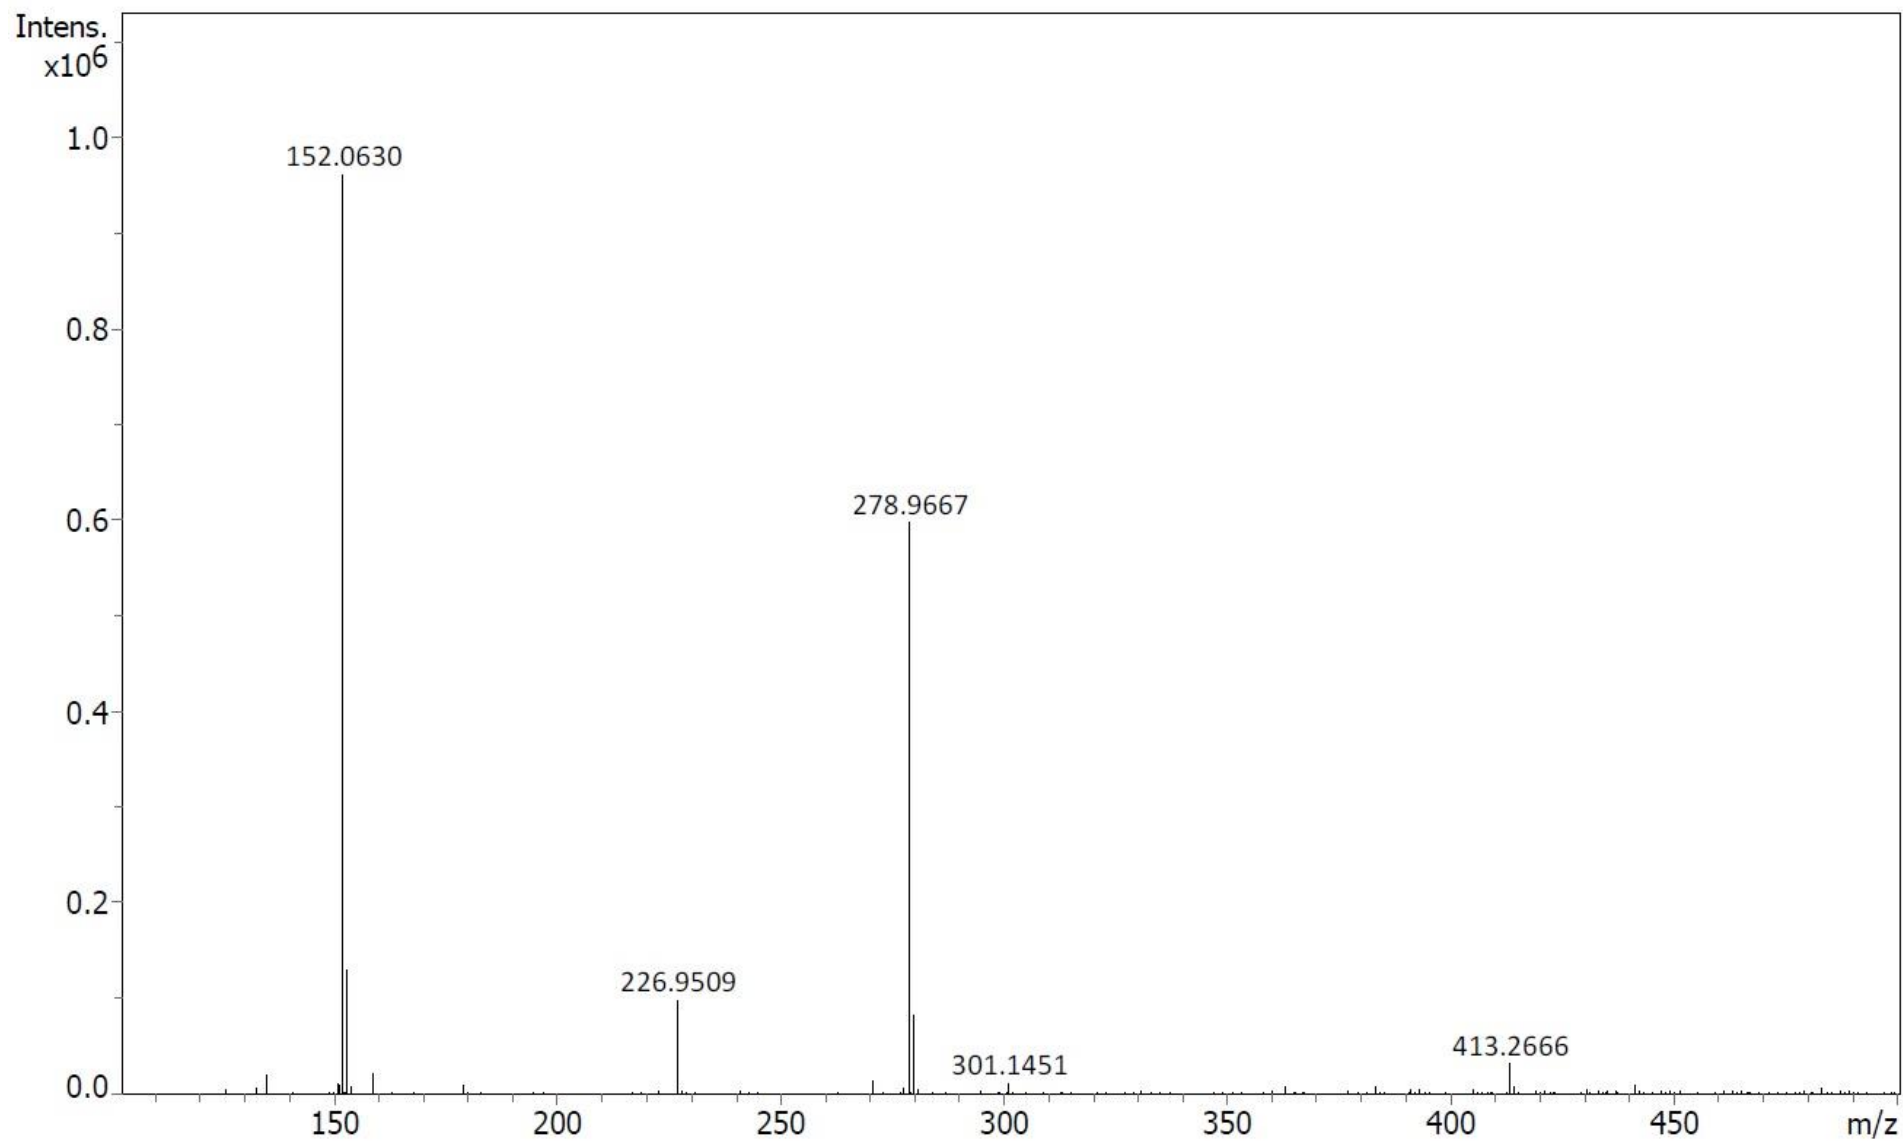

**Figure S9.** HRESI<sup>+</sup>-MS of Cat3<sup>OTf</sup>.

## Representative $^1\text{H}$ NMR monitoring spectra

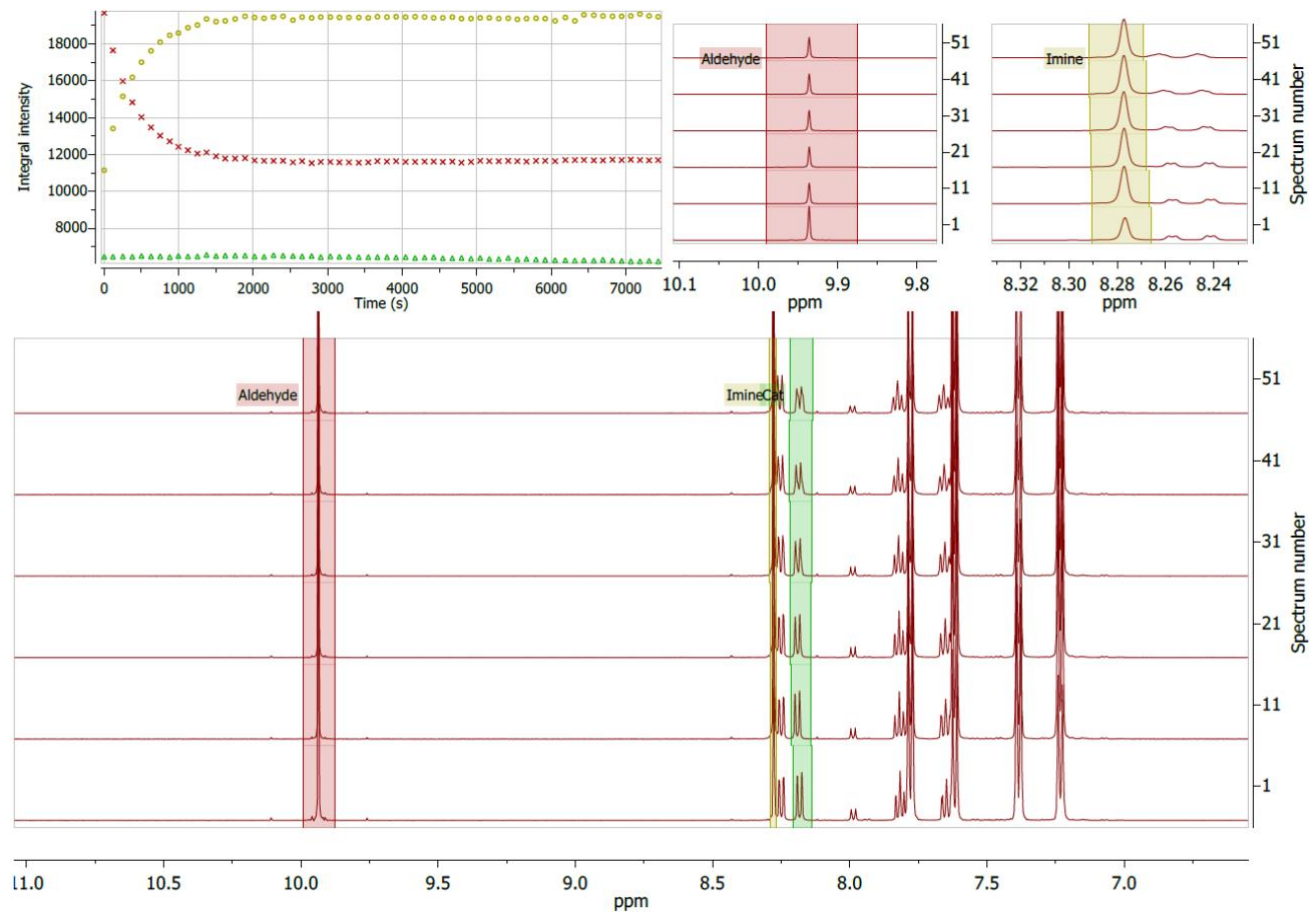

**Figure S10.** Example of used signals in  $^1\text{H}$  NMR monitoring in case of system  $\text{CD}_3\text{CN} - \text{Cat3}^{\text{OTf}}$

Plots representing the catalysts' stability in each <sup>1</sup>H NMR monitoring experiments.

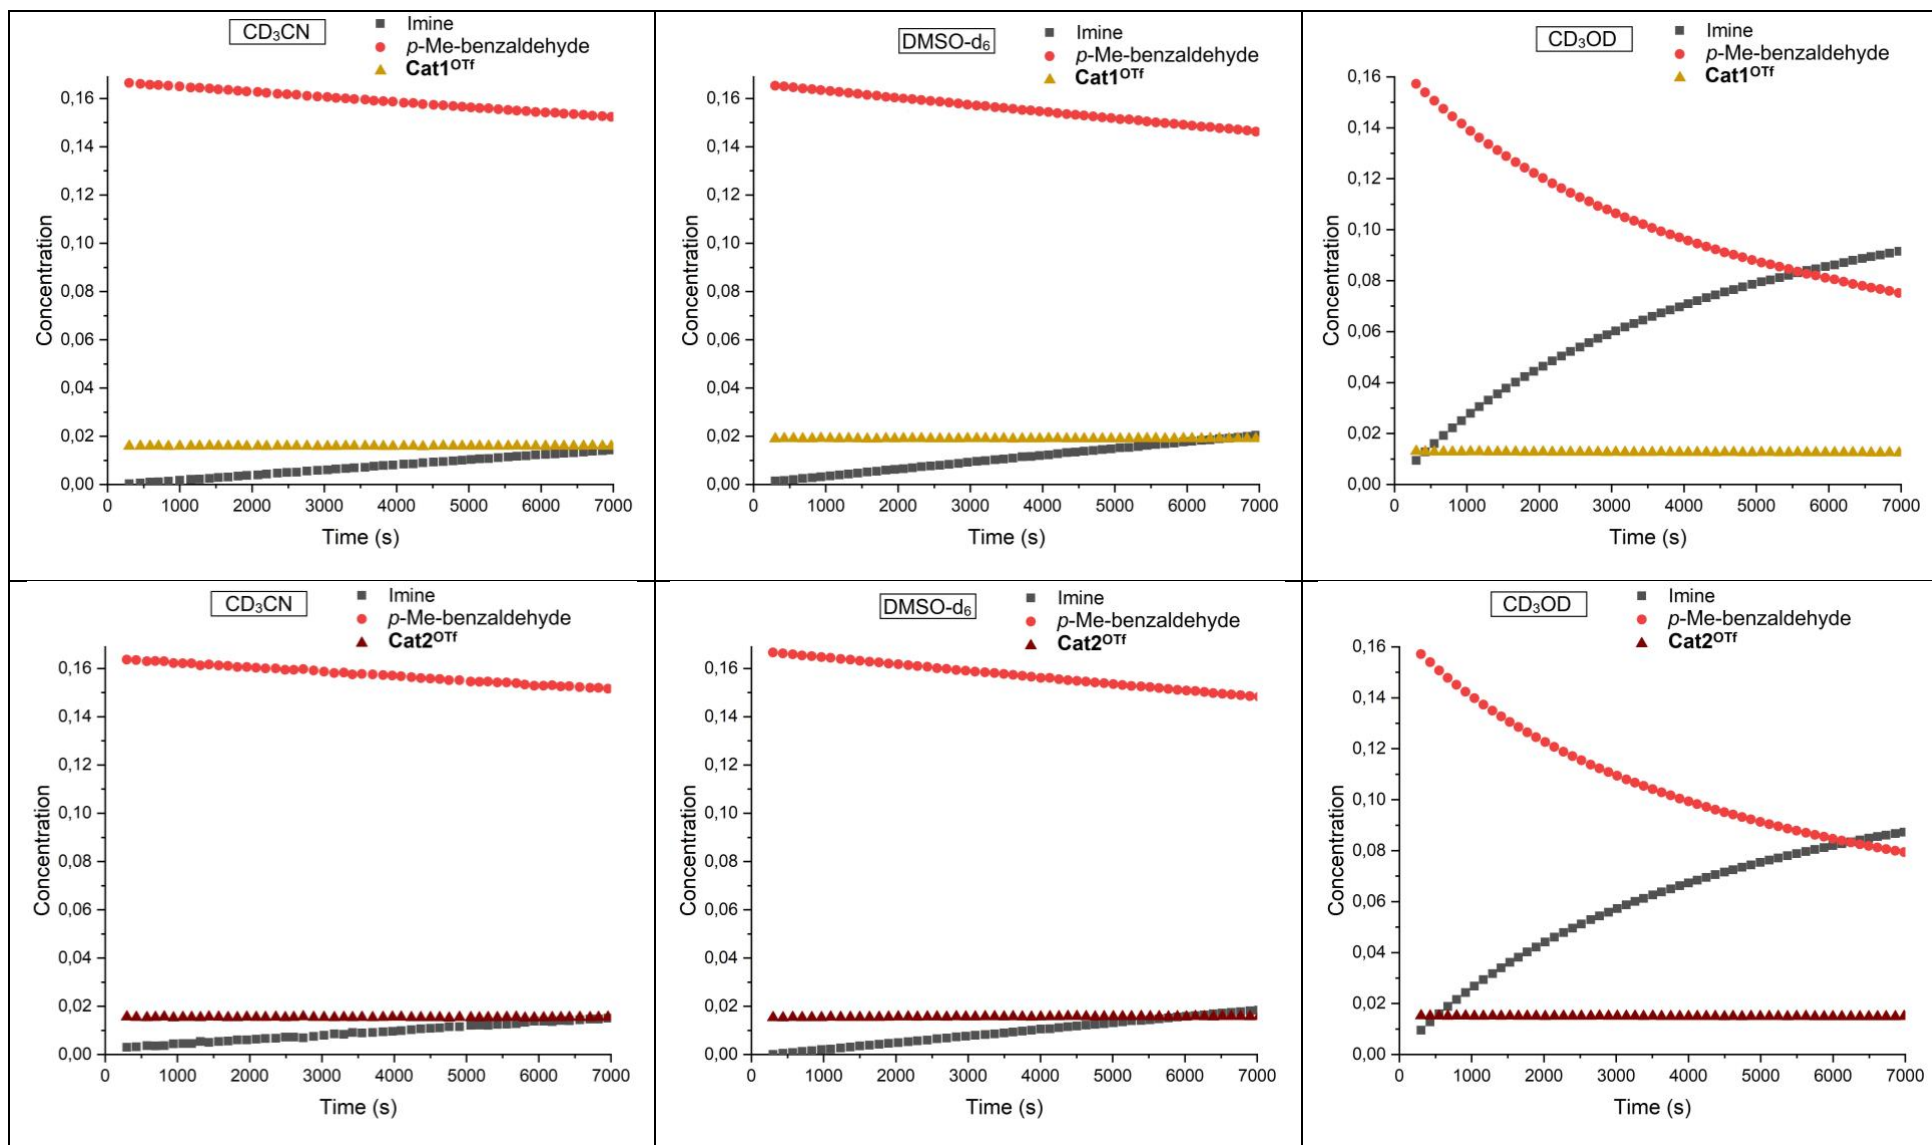

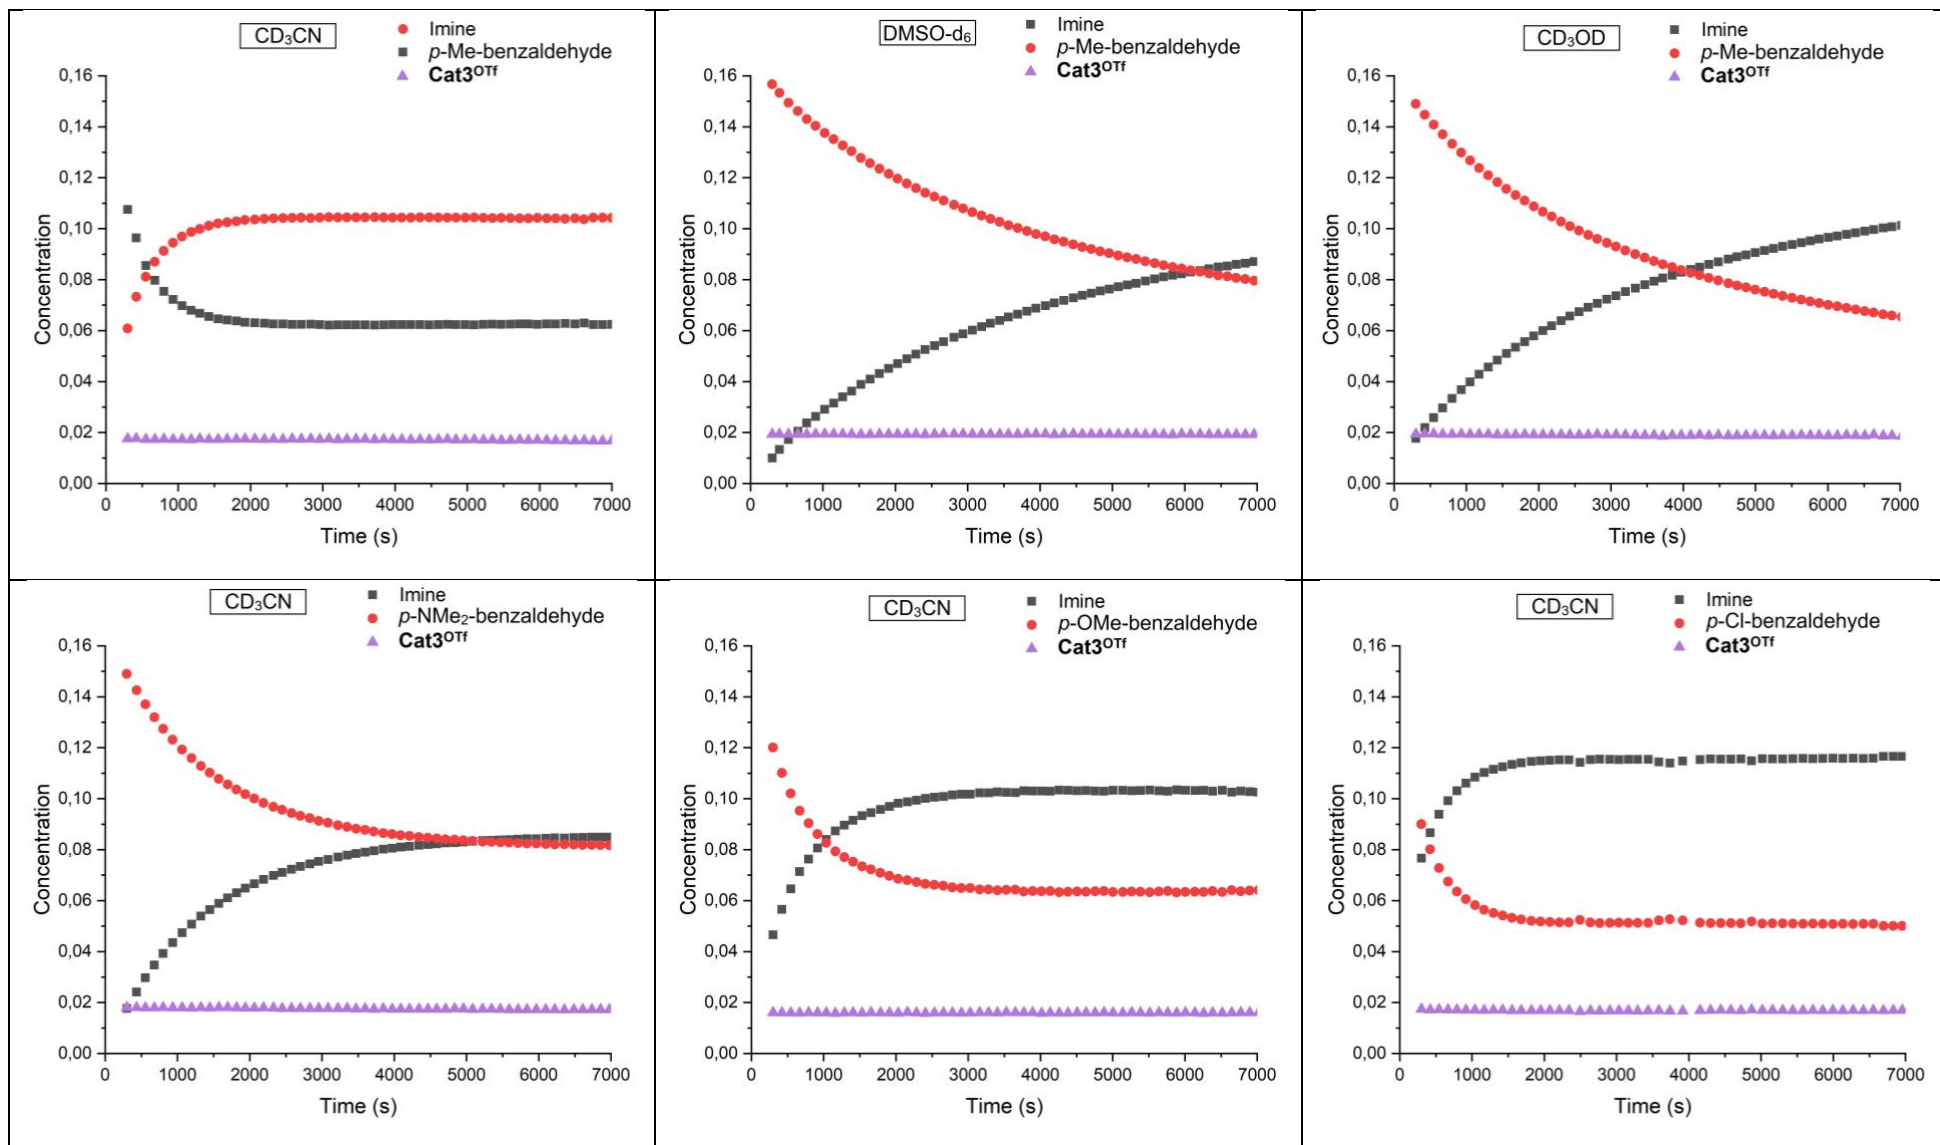



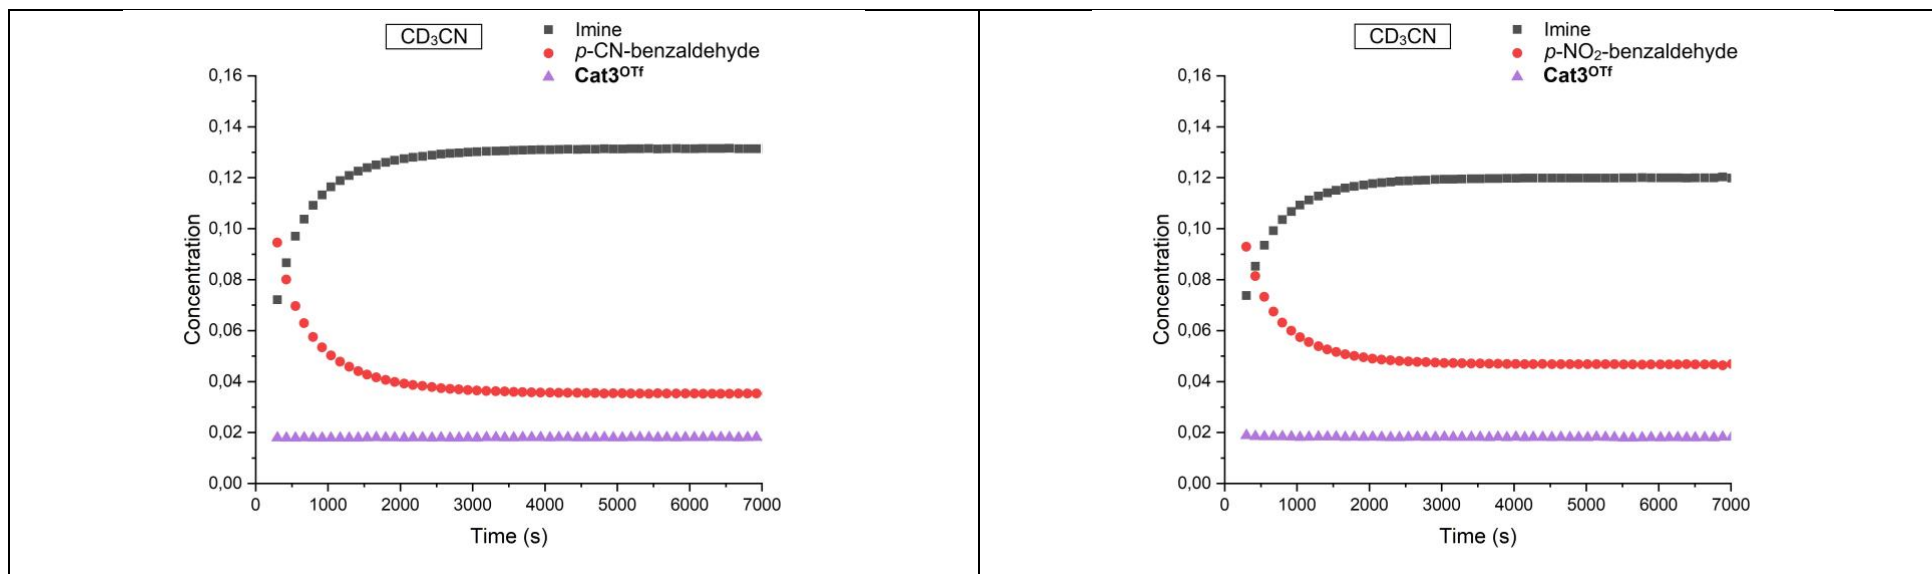

## Derivation of equations for calculating the reaction rate constants

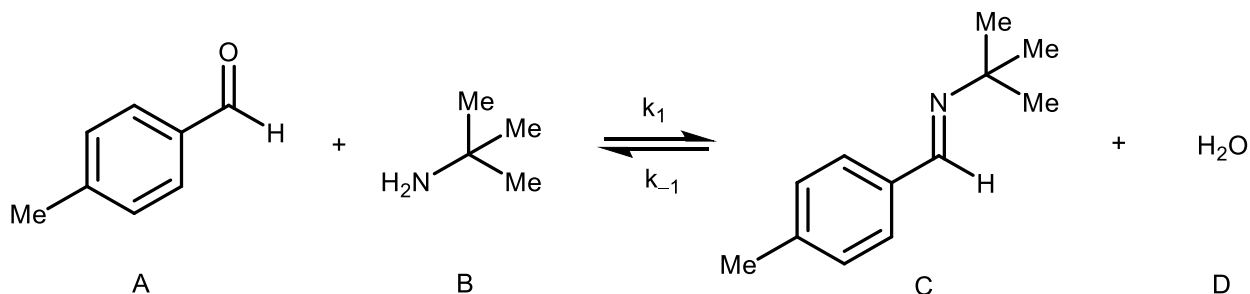

The rate of the reversible reaction ( $\omega$ ) can be represented as the difference between the rates of the forward reaction ( $\omega_1$ ) and reverse reaction ( $\omega_{-1}$ ):

$$\omega = \omega_1 - \omega_{-1}.$$

The rate of the forward reaction is:

$$\omega_1 = k_1 ab,$$

where  $k_1$  – the rate constant of the forward reaction ( $M^{-1} s^{-1}$ ),  $a$  – concentration of aldehyde (M),  $b$  – concentration of amine (M).

The rate of the reverse reaction is:

$$\omega_{-1} = k_{-1} cd,$$

where  $k_{-1}$  – the rate constant of the reverse reaction ( $M^{-1} s^{-1}$ ),  $c$  – concentration of imine (M),  $d$  – concentration of water (M).

Then,

$$\omega = k_1 ab - k_{-1} cd.$$

Since the experiments have always used equivalent amounts of aldehyde and amine, it is possible to replace the designation of amine concentration with aldehyde concentration:

$$a_0 = b_0 \Rightarrow a = b \text{ and } a_{eq} = b_{eq},$$

where  $a_{eq}$  and  $b_{eq}$  – equilibrium concentrations of aldehyde and amine,

$$\omega = k_1 a^2 - k_{-1} cd.$$

When equilibrium is reached, the rate of the reversible reaction becomes 0:

$$\omega_{eq} = k_1 a_{eq}^2 - k_{-1} c_{eq} d_{eq} = 0.$$

Now we can express the equilibrium constant as the ratio of the reaction rate constants or the ratio of the equilibrium concentrations:

$$k_1 a_{eq}^2 = k_{-1} c_{eq} d_{eq}$$

$$K = \frac{k_1}{k_{-1}} = \frac{c_{eq} d_{eq}}{a_{eq}^2},$$

where  $K$  – equilibrium constant.

We introduce  $x$  – the depth of the reversible reaction (M):

$$x = a_0 - a = b_0 - b = c - c_0 = d - d_0,$$

It means that

$$a = a_0 - x = b_0 - x,$$

$$c = x + c_0,$$

But due to the fact that we do not have an imine at the beginning of the reaction, i.e.  $c_0 = 0$ ,

$$c = x$$

and

$$d = x + d_0,$$

because the solvent contains trace amounts of water,  $d_0 \neq 0$ . We determined the concentration  $d_0$  for each experiment. The concentration  $x_{eq}$  has been determined as equilibrium concentration of imine ( $x_{eq} = c_{eq}$ ). Also, we can use it for calculating of  $K$ :

$$K = \frac{x_{eq}(x_{eq} + d_0)}{(a_0 - x_{eq})^2}$$

Let's write an expression for the reaction rate, where we express all concentrations in terms of  $x$ :

$$\omega = k_1(a_0 - x)^2 - k_{-1}x(x + d_0)$$

This expression must be factorized. To do this, you need to find the roots of the quadratic equation at a reversible reaction rate of 0, i.e. at equilibrium concentrations ( $x_{eq}$ ):

$$k_1(a_0 - x_{eq})^2 - k_{-1}x_{eq}(x_{eq} + d_0) = 0$$

by Vieta's theorem:

$$x_{eq} + x_{eq}^* = \frac{2k_1 a_0 + k_{-1} d_0}{k_1 - k_{-1}} \quad | \div k_{-1},$$

where  $x_{eq}$  – experimental depth of the reversible reaction,  $x_{eq}^*$  – an additional value that has no physical meaning

$$x_{eq} + x_{eq}^* = \frac{2Ka_0 + d_0}{K - 1}$$

$$x_{eq}^* = \frac{2Ka_0 + d_0}{K - 1} - x_{eq}$$

Represent the reaction rate function in the factorized form:

$$\omega = (k_1 - k_{-1})(x - x_{eq})(x - x_{eq}^*)$$

In differential form:

$$\omega = \frac{dx}{dt} = (k_1 - k_{-1})(x - x_{eq})(x - x_{eq}^*)$$

We can integrate it:

$$\int \frac{dx}{(x - x_{eq})(x - x_{eq}^*)} = \int (k_1 - k_{-1}) dt$$

$$\ln \frac{x_{eq}^*(x - x_{eq})}{x_{eq}(x - x_{eq}^*)} = (k_1 - k_{-1})(x_{eq} - x_{eq}^*)t$$

We can represent this function as a straight line in linearized coordinates  $(t; \ln \frac{x_{eq}^*(x - x_{eq})}{x_{eq}(x - x_{eq}^*)})$  with

the slope  $S = (k_1 - k_{-1})(x_{eq} - x_{eq}^*)$ .

Finally, the system of equations must be solved:

$$\begin{cases} S = (k_1 - k_{-1})(x_{eq} - x_{eq}^*) \\ K = \frac{k_1}{k_{-1}} \end{cases}$$

$$k_1 = \frac{SK}{(x_{eq} - x_{eq}^*)(K - 1)}$$

$$k_{-1} = \frac{k_1}{K} = \frac{S}{(x_{eq} - x_{eq}^*)(K - 1)}$$

**Table S1.** Calculated total electronic energies (E, in Hartree), enthalpies (H, in Hartree), Gibbs free energies (G, in Hartree), and entropies (S, cal/mol•K) for optimized equilibrium model structures.

| Model structure                            | E              | H            | G            | S       |
|--------------------------------------------|----------------|--------------|--------------|---------|
| <b>H<sub>2</sub>O</b>                      | -76.3733780915 | -76.348052   | -76.369486   | 45.111  |
| <b>Me<sub>2</sub>SO</b>                    | -553.065637884 | -552.978329  | -553.012939  | 72.843  |
| <b>MeCN</b>                                | -132.692388989 | -132.641721  | -132.670260  | 60.065  |
| <b>MeOH</b>                                | -115.654766560 | -115.598251  | -115.625092  | 56.491  |
| <b>CHCl<sub>3</sub></b>                    | -1419.16396168 | -1419.138146 | -1419.172634 | 72.587  |
| <b>DMF</b>                                 | -248.392497055 | -248.281154  | -248.317282  | 76.039  |
| <b>Pyridine</b>                            | -248.171803951 | -248.076658  | -248.109232  | 68.558  |
| <b>THF</b>                                 | -232.336639049 | -232.212121  | -232.245959  | 71.218  |
| <b>H<sub>2</sub>O...H<sub>2</sub>O</b>     | -152.759928707 | -152.706132  | -152.738057  | 67.192  |
| <b>Me<sub>2</sub>SO...Me<sub>2</sub>SO</b> | -1106.15823194 | -1105.981024 | -1106.032622 | 108.599 |
| <b>MeCN...MeCN</b>                         | -265.390057597 | -265.286684  | -265.334079  | 99.751  |
| <b>MeOH...MeOH</b>                         | -231.323554167 | -231.207966  | -231.248838  | 86.023  |
| <b>CHCl<sub>3</sub>...CHCl<sub>3</sub></b> | -2838.33319760 | -2838.279537 | -2838.335211 | 117.176 |
| <b>DMF...DMF</b>                           | -496.803514693 | -496.578030  | -496.629587  | 108.511 |
| <b>Pyridine...Pyridine</b>                 | -496.351167709 | -496.158989  | -496.208832  | 104.905 |
| <b>THF...THF</b>                           | -464.680697093 | -464.429474  | -464.481684  | 109.886 |
| <b>Cat1<sup>+</sup></b>                    | -1091.36335792 | -1091.092011 | -1091.149702 | 121.422 |
| <b>Cat2<sup>+</sup></b>                    | -3092.65033002 | -3092.379265 | -3092.437958 | 123.529 |
| <b>Cat3<sup>+</sup></b>                    | -472.960288041 | -472.788091  | -472.834997  | 98.721  |
| <b>Cat1<sup>+</sup>...H<sub>2</sub>O</b>   | -1167.75756654 | -1167.458135 | -1167.522213 | 134.863 |
| <b>Cat1<sup>+</sup>...Me<sub>2</sub>SO</b> | -1644.45985240 | -1644.099410 | -1644.172767 | 154.393 |
| <b>Cat1<sup>+</sup>...MeCN</b>             | -1224.07631922 | -1223.751791 | -1223.823670 | 151.283 |
| <b>Cat1<sup>+</sup>...MeOH</b>             | -1207.03926423 | -1206.709695 | -1206.777125 | 141.918 |
| <b>Cat1<sup>+</sup>...CHCl<sub>3</sub></b> | -2510.53719308 | -2510.237787 | -2510.316798 | 166.292 |
| <b>Cat1<sup>+</sup>...DMF</b>              | -1339.78308928 | -1339.397629 | -1339.475774 | 164.470 |
| <b>Cat1<sup>+</sup>...Pyridine</b>         | -1339.55908935 | -1339.189811 | -1339.263685 | 155.481 |
| <b>Cat1<sup>+</sup>...THF</b>              | -1323.72409936 | -1323.325185 | -1323.398728 | 154.785 |
| <b>Cat2<sup>+</sup>...H<sub>2</sub>O</b>   | -3169.05297747 | -3168.753785 | -3168.818663 | 136.547 |
| <b>Cat2<sup>+</sup>...Me<sub>2</sub>SO</b> | -3645.76055126 | -3645.399655 | -3645.474634 | 157.807 |
| <b>Cat2<sup>+</sup>...MeCN</b>             | -3225.37213906 | -3225.047777 | -3225.119496 | 150.946 |
| <b>Cat2<sup>+</sup>...MeOH</b>             | -3208.33584886 | -3208.005666 | -3208.074713 | 145.322 |
| <b>Cat2<sup>+</sup>...CHCl<sub>3</sub></b> | -4511.83230102 | -4511.533004 | -4511.609431 | 160.854 |
| <b>Cat2<sup>+</sup>...DMF</b>              | -3341.08159936 | -3340.696110 | -3340.773480 | 162.839 |
| <b>Cat2<sup>+</sup>...Pyridine</b>         | -3340.85891056 | -3340.489890 | -3340.563515 | 154.958 |
| <b>Cat2<sup>+</sup>...THF</b>              | -3325.02178704 | -3324.623101 | -3324.697059 | 155.657 |
| <b>Cat3<sup>+</sup>...H<sub>2</sub>O</b>   | -549.361722782 | -549.161279  | -549.215885  | 114.928 |
| <b>Cat3<sup>+</sup>...Me<sub>2</sub>SO</b> | -1026.06889066 | -1025.807532 | -1025.870812 | 133.184 |
| <b>Cat3<sup>+</sup>...MeCN</b>             | -605.681394758 | -605.456105  | -605.518922  | 132.208 |
| <b>Cat3<sup>+</sup>...MeOH</b>             | -588.643269351 | -588.411677  | -588.470182  | 123.134 |
| <b>Cat3<sup>+</sup>...CHCl<sub>3</sub></b> | -1892.13640412 | -1891.936201 | -1892.004105 | 142.916 |
| <b>Cat3<sup>+</sup>...DMF</b>              | -721.390298114 | -721.103678  | -721.171538  | 142.822 |
| <b>Cat3<sup>+</sup>...Pyridine</b>         | -721.166518191 | -720.896305  | -720.960062  | 134.188 |
| <b>Cat3<sup>+</sup>...THF</b>              | -705.328407926 | -705.028736  | -705.093573  | 136.461 |
| <b>A</b>                                   | -384.717531131 | -384.569220  | -384.612192  | 90.443  |

|                               |                |              |              |         |
|-------------------------------|----------------|--------------|--------------|---------|
| <b>Cat1<sup>+</sup>...A</b>   | -1476.10413555 | -1475.682017 | -1475.766144 | 177.059 |
| <b>Cat2<sup>+</sup>...A</b>   | -3477.40157908 | -3476.979625 | -3477.063335 | 176.183 |
| <b>Cat3<sup>+</sup>...A</b>   | -857.709720608 | -857.386549  | -857.460651  | 155.961 |
| <b>H<sub>2</sub>O...A</b>     | -461.105461234 | -460.928754  | -460.978219  | 104.108 |
| <b>Me<sub>2</sub>SO...A</b>   | -937.797733385 | -937.559962  | -937.622910  | 132.485 |
| <b>MeCN...A</b>               | -517.418829065 | -517.217644  | -517.274872  | 120.447 |
| <b>MeOH...A</b>               | -500.388179329 | -500.180660  | -500.234318  | 112.934 |
| <b>CHCl<sub>3</sub>...A</b>   | -1803.89174769 | -1803.715634 | -1803.778537 | 132.391 |
| <b>DMF...A</b>                | -633.119409418 | -632.858380  | -632.920617  | 130.989 |
| <b>Pyridine...A</b>           | -632.896848513 | -632.651220  | -632.712957  | 129.938 |
| <b>THF...A</b>                | -617.064590221 | -616.789341  | -616.849561  | 126.742 |
| <b>B</b>                      | -213.685990129 | -213.527504  | -213.563836  | 76.468  |
| <b>Cat1<sup>+</sup>...B</b>   | -1305.07030503 | -1304.637993 | -1304.714859 | 161.777 |
| <b>Cat2<sup>+</sup>...B</b>   | -3306.37316144 | -3305.940502 | -3306.016805 | 160.592 |
| <b>Cat3<sup>+</sup>...B</b>   | -686.680433630 | -686.346826  | -686.413226  | 139.751 |
| <b>H<sub>2</sub>O...B</b>     | -290.078585633 | -289.891661  | -289.934314  | 89.771  |
| <b>Me<sub>2</sub>SO...B</b>   | -766.768146356 | -766.519913  | -766.574831  | 115.586 |
| <b>MeCN...B</b>               | -346.388391530 | -346.178258  | -346.227059  | 102.711 |
| <b>MeOH...B</b>               | -329.361045750 | -329.143581  | -329.191133  | 100.083 |
| <b>CHCl<sub>3</sub>...B</b>   | -1632.86500130 | -1632.678440 | -1632.734547 | 118.087 |
| <b>DMF...B</b>                | -462.088866185 | -461.816542  | -461.874375  | 121.721 |
| <b>Pyridine...B</b>           | -461.868720839 | -461.612863  | -461.667442  | 114.872 |
| <b>THF...B</b>                | -446.032847610 | -445.747287  | -445.800717  | 112.454 |
| <b>TS</b>                     | -812.085680245 | -811.621371  | -811.694353  | 153.603 |
| <b>Cat1<sup>+</sup>...TS</b>  | -1903.49670315 | -1902.757157 | -1902.870561 | 238.678 |
| <b>Cat2<sup>+</sup>...TS</b>  | -3904.80357124 | -3904.062362 | -3904.172320 | 231.425 |
| <b>Cat3<sup>+</sup>...TS</b>  | -1285.11961289 | -1284.477134 | -1284.579537 | 215.525 |
| <b>H<sub>2</sub>O...TS</b>    | -888.492976092 | -888.000243  | -888.077846  | 163.328 |
| <b>Me<sub>2</sub>SO...TS</b>  | -1365.17326486 | -1364.618151 | -1364.708493 | 190.140 |
| <b>MeCN...TS</b>              | -944.795846664 | -944.277351  | -944.364468  | 183.354 |
| <b>MeOH...TS</b>              | -927.774996811 | -927.252184  | -927.333441  | 171.018 |
| <b>Cat1<sup>+</sup>...TS*</b> | -1766.18964935 | -1765.581834 | -1765.678960 | 204.418 |
| <b>Cat2<sup>+</sup>...TS*</b> | -3767.48258353 | -3766.876734 | -3766.974469 | 205.700 |
| <b>Cat3<sup>+</sup>...TS*</b> | -1147.79563290 | -1147.288462 | -1147.378491 | 189.481 |
| <b>Me<sub>2</sub>SO...TS*</b> | -1227.86712966 | -1227.445153 | -1227.521709 | 161.127 |
| <b>MeCN...TS*</b>             | -807.490975634 | -807.105230  | -807.178382  | 153.962 |
| <b>MeOH...TS*</b>             | -790.461448830 | -790.069790  | -790.143832  | 155.835 |
